# Supplementary material for: CLIMP-63 is a gentamicin-binding protein that is involved in drug-induced cytotoxicity
Source: PubMed Central journal article supplement — Cell Death Dis. 2010 Nov 18;1(11):e102–. doi: 10.1038/cddis.2010.80 (PMC3032319; doi:10.1038/cddis.2010.80), 2010-11-18
Supplement: cddis201080x2.pdf [file cddis201080x2.pdf]

**Supplementary Table 1: Proteins identified in excised gels regions indicated in Figure 1C.**

| Gel region and proteins identified <sup>1</sup>                                            | Protein entry names <sup>2</sup>                                                                    | Protein MW <sup>3</sup> | Protein probability <sup>4</sup> | # of unique peptides <sup>5</sup> | # of unique spectra <sup>6</sup> | # of total spectra <sup>7</sup> | % sequence coverage <sup>8</sup> |
|--------------------------------------------------------------------------------------------|-----------------------------------------------------------------------------------------------------|-------------------------|----------------------------------|-----------------------------------|----------------------------------|---------------------------------|----------------------------------|
| <b>Gel region 1</b>                                                                        |                                                                                                     |                         |                                  |                                   |                                  |                                 |                                  |
| Myosin-9 (Q8VDD5)                                                                          | MYH9_MOUSE                                                                                          | 226,360                 | 100.00%                          | 20                                | 20                               | 23                              | 14.40%                           |
| <b>Gel region 2</b>                                                                        |                                                                                                     |                         |                                  |                                   |                                  |                                 |                                  |
| Caldesmon 1 (O8VCO8)                                                                       | QBVCQ8_MOUSE                                                                                        | 60,435                  | 100.00%                          | 36                                | 45                               | 54                              | 53.80%                           |
| Heterogeneous nuclear ribonucleoprotein M (B8JK30)                                         | B8JK30_MOUSE.HNRP1_MOUSE.Q3THB3_MOUSE.Q3TW40_MOUSE.Q570Z0_MOUSE                                     | 73,725                  | 100.00%                          | 32                                | 33                               | 43                              | 47.50%                           |
| Heat shock cognate 71 kDa protein (P63017)                                                 | HSP7C_MOUSE.Q3TEK2_MOUSE.Q3TH56_MOUSE.Q3TQ13_MOUSE.Q3TJ3_MOUSE.Q3UBA6_MOUSE                         | 70,767                  | 100.00%                          | 25                                | 32                               | 39                              | 38.10%                           |
| Signal recognition particle 68 (A2AAN1)                                                    | A2AAN1_MOUSE.SRP68_MOUSE                                                                            | 70,559                  | 100.00%                          | 17                                | 18                               | 18                              | 31.40%                           |
| Polyadenylate-binding protein 1 (P29341)                                                   | PABP1_MOUSE.Q3UBU8_MOUSE.Q8BN32_MOUSE.Q99L36_MOUSE                                                  | 70,623                  | 100.00%                          | 13                                | 14                               | 15                              | 22.60%                           |
| Probable ATP-dependent RNA helicase DDX17 (Q501J6)                                         | DDX17_MOUSE.Q3U741_MOUSE                                                                            | 72,568                  | 100.00%                          | 11                                | 11                               | 11                              | 19.60%                           |
| Insulin-like growth factor 2 mRNA-binding protein 3 (Q9CPN8)                               | IF2B3_MOUSE                                                                                         | 63,558                  | 100.00%                          | 7                                 | 7                                | 7                               | 15.00%                           |
| Actin, cytoplasmic 2 (P63260)                                                              | ACTB_MOUSE.ACTG_MOUSE.B2RRX1_MOUSE.Q3TSB7_MOUSE.Q3U5R4_MOUSE.Q3UAF6_MOUSE.Q3UAF7_MOUSE.Q4KL81_MOUSE | 41,794                  | 100.00%                          | 7                                 | 7                                | 7                               | 22.90%                           |
| Coronin, actin binding protein 1B (A2R522)                                                 | A2R522_MOUSE.COR1B_MOUSE                                                                            | 53,894                  | 100.00%                          | 6                                 | 6                                | 6                               | 12.20%                           |
| Ras GTPase-activating protein-binding protein 2 (P97379)                                   | G3BP2_MOUSE.Q3U541_MOUSE.Q3U6B1_MOUSE                                                               | 61,047                  | 100.00%                          | 5                                 | 5                                | 5                               | 9.45%                            |
| <b>Gel region 3</b>                                                                        |                                                                                                     |                         |                                  |                                   |                                  |                                 |                                  |
| Cytoskeleton-associated protein 4 (B2RRB4)                                                 | B2RRB4_MOUSE.CKAP4_MOUSE                                                                            | 63,674                  | 100.00%                          | 24                                | 31                               | 33                              | 42.80%                           |
| Calreticulin (B2MWM9)                                                                      | B2MWM9_MOUSE.CALR_MOUSE.Q3UWP8_MOUSE                                                                | 47,978                  | 100.00%                          | 17                                | 21                               | 34                              | 45.40%                           |
| Coatomer subunit delta (Q5XJY5)                                                            | COPD_MOUSE.Q91W48_MOUSE                                                                             | 57,200                  | 100.00%                          | 17                                | 19                               | 20                              | 32.90%                           |
| Eukaryotic translation initiation factor 3 subunit L (Q8QZY1)                              | EIF3L_MOUSE                                                                                         | 66,597                  | 100.00%                          | 10                                | 11                               | 11                              | 20.20%                           |
| 26S proteasome non-ATPase regulatory subunit 3 (P14685)                                    | PSMD3_MOUSE.Q3TP95_MOUSE.Q3ULJ5_MOUSE.Q8BK46_MOUSE                                                  | 60,702                  | 100.00%                          | 9                                 | 9                                | 9                               | 19.10%                           |
| Putative uncharacterized protein (Q3THP2)                                                  | Q3THP2_MOUSE.Q3TM73_MOUSE.Q3UBR2_MOUSE.Q5SXA8_MOUSE.SYRC_MOUSE                                      | 75,676                  | 100.00%                          | 9                                 | 9                                | 9                               | 15.20%                           |
| Heterogeneous nuclear ribonucleoprotein K (B2M1R6)                                         | B2M1R6_MOUSE.HNRPK_MOUSE.Q3TJ38_MOUSE.Q3TL71_MOUSE.Q3TUA1_MOUSE.Q5FWJ5_MOUSE                        | 50,991                  | 100.00%                          | 9                                 | 9                                | 9                               | 25.10%                           |
| Chaperonin containing Tcp1, subunit fta (Zeta) (Q3TI05)                                    | Q3TI05_MOUSE.Q3TI62_MOUSE.Q3TI19_MOUSE.Q3TIW97_MOUSE.Q52K69_MOUSE.TCP2_MOUSE                        | 58,060                  | 100.00%                          | 8                                 | 8                                | 8                               | 17.70%                           |
| Eukaryotic translation initiation factor 3 subunit D (O70194)                              | EIF3D_MOUSE                                                                                         | 63,972                  | 100.00%                          | 8                                 | 8                                | 8                               | 15.70%                           |
| Protein kinase C and casein kinase substrate in neurons protein 2 (Q9WVE8)                 | PACN2_MOUSE.Q3TDA7_MOUSE                                                                            | 55,815                  | 100.00%                          | 8                                 | 8                                | 8                               | 17.30%                           |
| Heterogeneous nuclear ribonucleoprotein Q (Q77MK9)                                         | HNRPQ_MOUSE                                                                                         | 69,616                  | 100.00%                          | 7                                 | 7                                | 7                               | 13.30%                           |
| THUMP domain-containing protein 3 (P97770)                                                 | THUM3_MOUSE                                                                                         | 56,413                  | 100.00%                          | 7                                 | 8                                | 8                               | 15.80%                           |
| Putative uncharacterized protein (Q3UKQ2)                                                  | Q3UKQ2_MOUSE.Q3UL22_MOUSE.Q6A0F1_MOUSE.Q9WVS5_MOUSE.TCPQ_MOUSE                                      | 59,538                  | 100.00%                          | 7                                 | 7                                | 7                               | 15.30%                           |
| Prolyl 4-hydroxylase subunit alpha-1 (Q60715)                                              | P4HA1_MOUSE.Q3TN84_MOUSE.Q3UF16_MOUSE                                                               | 60,908                  | 100.00%                          | 7                                 | 8                                | 8                               | 16.10%                           |
| Ribophorin II (A2AC06)                                                                     | A2AC06_MOUSE.A2AC57_MOUSE.Q3U505_MOUSE.Q61833_MOUSE.RPN2_MOUSE                                      | 67,485                  | 100.00%                          | 6                                 | 7                                | 7                               | 15.50%                           |
| Serine/threonine-protein phosphatase 2A 65 kDa regulatory subunit A alpha isoform (Q76M23) | A2AA_MOUSE.Q8C2E1_MOUSE                                                                             | 65,306                  | 100.00%                          | 6                                 | 6                                | 6                               | 12.60%                           |
| Myelin basic protein expression factor 2, repressor (A2ATP5)                               | A2ATP5_MOUSE.A2ATP6_MOUSE.A7UQY4_MOUSE.MYEF2_MOUSE                                                  | 59,527                  | 100.00%                          | 6                                 | 6                                | 6                               | 11.60%                           |
| DEAD (Asp-Glu-Ala-Asp) box polypeptide 5 (A1L333)                                          | A1L333_MOUSE.DDX5_MOUSE.Q3V0Z9_MOUSE.Q5UZZ2_MOUSE.Q8BT50_MOUSE                                      | 69,304                  | 100.00%                          | 6                                 | 6                                | 6                               | 15.00%                           |
| Putative uncharacterized protein (Fragment) (Q3TE06)                                       | Q3TE06_MOUSE.Q3TJV2_MOUSE.Q8QZ19_MOUSE.Q9DBN6_MOUSE.Q8Q208_MOUSE.WDR1_MOUSE                         | 66,388                  | 100.00%                          | 6                                 | 6                                | 6                               | 11.20%                           |
| Poly(U)-binding-splicing factor PUF60 (Q3UEB3)                                             | PUF60_MOUSE                                                                                         | 60,231                  | 100.00%                          | 5                                 | 5                                | 5                               | 11.30%                           |
| Ras GTPase-activating protein-binding protein 2 (P97379)                                   | G3BP2_MOUSE.Q3U541_MOUSE.Q3U6B1_MOUSE                                                               | 61,047                  | 100.00%                          | 5                                 | 6                                | 6                               | 9.64%                            |
| Putative adenosylhomocysteinase 2 (Q805W1)                                                 | SAHH2_MOUSE                                                                                         | 58,934                  | 100.00%                          | 5                                 | 5                                | 5                               | 9.43%                            |
| <b>Gel region 4</b>                                                                        |                                                                                                     |                         |                                  |                                   |                                  |                                 |                                  |
| Actin, cytoplasmic 2 (P63260)                                                              | ACTB_MOUSE.ACTG_MOUSE.B2RRX1_MOUSE.Q3TSB7_MOUSE.Q3U5R4_MOUSE.Q3UAF6_MOUSE.Q3UAF7_MOUSE.Q4KL81_MOUSE | 41,794                  | 100.00%                          | 8                                 | 8                                | 9                               | 33.90%                           |
| <b>Gel region 5</b>                                                                        |                                                                                                     |                         |                                  |                                   |                                  |                                 |                                  |
| Tropomyosin 1, alpha (Q564G1)                                                              | Q564G1_MOUSE                                                                                        | 32,692                  | 100.00%                          | 27                                | 37                               | 45                              | 51.40%                           |
| Ribosomal protein large, P0 (Q5M8R8)                                                       | Q5M8R8_MOUSE.RLA0_MOUSE                                                                             | 34,199                  | 100.00%                          | 12                                | 16                               | 18                              | 50.20%                           |
| Ribosomal protein L5 (Q58EUE)                                                              | Q3U850_MOUSE.Q58EUE_MOUSE.RL5_MOUSE                                                                 | 34,339                  | 100.00%                          | 12                                | 15                               | 18                              | 37.70%                           |
| Mitochondrial ribosomal protein L39 (A6X954)                                               | A6X954_MOUSE.Q8CCX9_MOUSE.RM39_MOUSE                                                                | 38,592                  | 100.00%                          | 6                                 | 6                                | 6                               | 18.20%                           |
| Guanine nucleotide-binding protein G(I)/G(S)/G(T) subunit beta-2 (P62880)                  | GBB2_MOUSE.Q3U9V4_MOUSE                                                                             | 37,314                  | 100.00%                          | 6                                 | 6                                | 6                               | 17.90%                           |

<sup>1</sup> Proteins identified by liquid chromatography-MS/MS analysis of in-gel tryptic digests. UniProtKB accession numbers for identified proteins are given in parenthesis. <sup>2</sup> Entry names for the identified proteins from the UniProtKB database. Multiple names are provided for protein entries which, due to sequence homology, contained the same complement of identified peptides. <sup>3</sup> Calculated molecular weight, based on the identified protein's sequence. <sup>4</sup> Probability of a correct protein identification calculated by Scaffold software using the method of Nesvizhskii et al. (2003). The probability of correct identification was 100% for all identified proteins due to the conservative requirement of 5 unique peptide matches to each entry. <sup>5</sup> The number of unique peptide sequences matched to the given protein entry following interpretation of the MS/MS data. <sup>6</sup> The number of unique MS/MS spectra matched to the given protein entry following interpretation of MS/MS spectra. This number is often higher than the number of unique peptides due to the presence of multiple charge sites for each peptide. <sup>7</sup> The number of total spectra assigned to the given protein entry. This is often higher than the number of unique MS/MS spectra due to redundant generation of MS/MS spectra for each peptide ion. <sup>8</sup> The percentage of the total proteins sequence matched to assigned MS/MS spectra.

Table S1
